# Supplementary material for: Flower-like gold nanoparticles for enhanced photothermal anticancer therapy by the delivery of pooled siRNA to inhibit heat shock stress response
Source: Royal Society of Chemistry journal article supplement (doi:10.1039/c8tb02418a), 2018-12-14
Supplement: c8tb02418a1.pdf [file c8tb02418a1.pdf]

## Supporting Information

# **Flower-Like Gold Nanoparticles for Enhanced Photothermal Anticancer Therapy by the Delivery of Pooled siRNAs to Inhibit Heat Shock Stress Response**

Yanan Liu,<sup>a,‡</sup> Meng Xu,<sup>a,‡</sup> Yingyu Zhao,<sup>a</sup> Xu Chen,<sup>a</sup> Xufeng Zhu,<sup>a</sup> Chunfang Wei,<sup>a</sup> Jie Liu,<sup>a,\*</sup> and Xiuying Qin<sup>a,\*</sup>

<sup>a</sup> 1.College of Pharmacy, Guilin Medical University, Guangxi Guilin, 541004, China.

2.Department of Chemistry, College of Chemistry and Materials Science, Jinan University, Guangzhou 510632, China.

<sup>‡</sup> These authors contributed equally.

\* Corresponding author: Jie Liu, Email: tliuliu@jnu.edu.cn.

Xiuying Qin, Email: xyqin6688@163.com

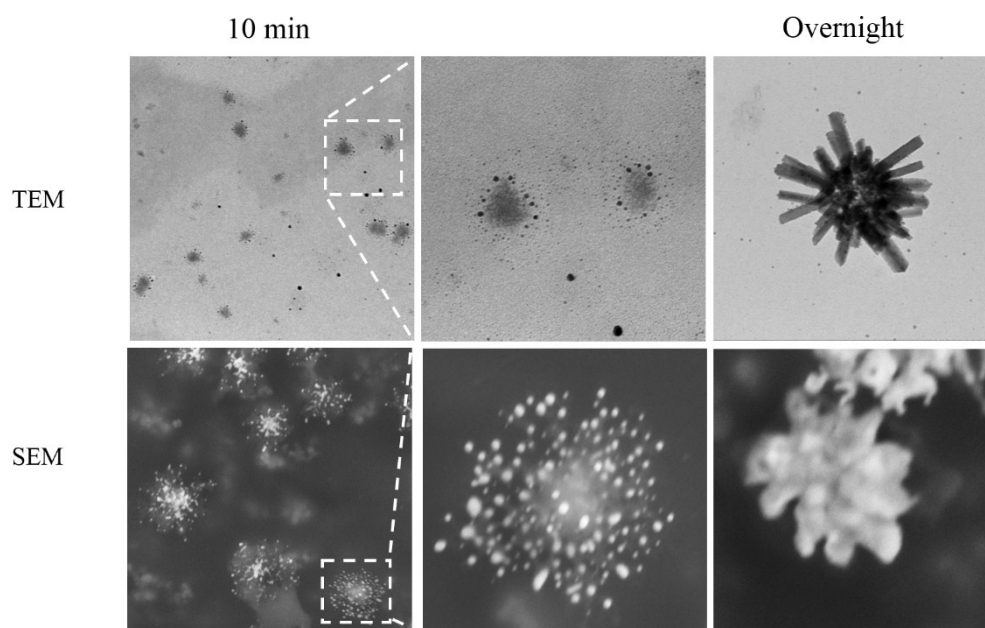

**Fig. S1** TEM and SEM images of gold nanoflowers (GNFs) taken at different reaction time.

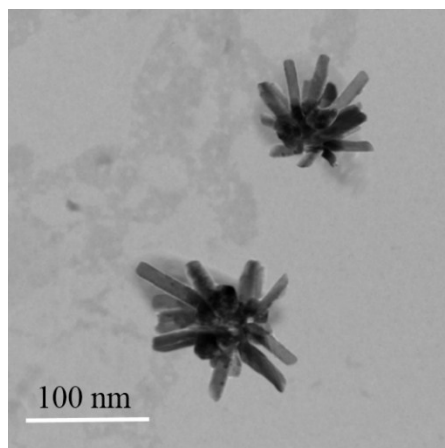

**Fig. S2** Transmission electron microscopy (TEM) images of Chit/PSS/CTAC-GNFs. Scale bars, 100 nm.

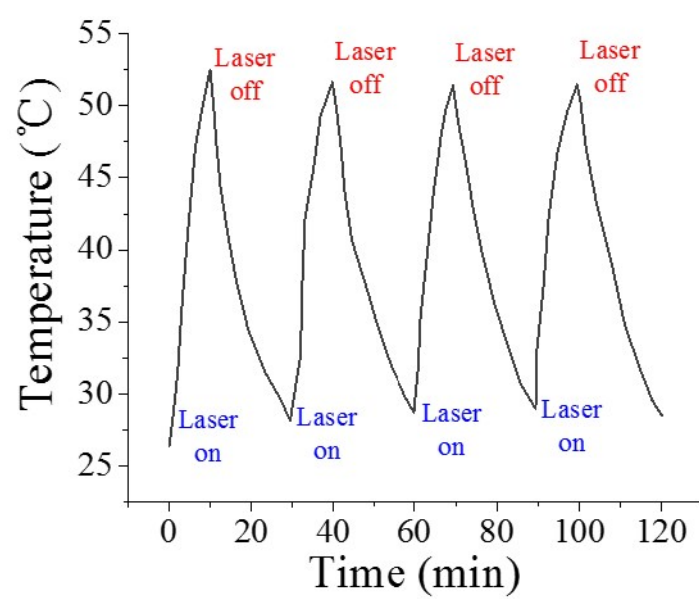

**Fig. S3** Recycling heating profile of GNFS-siRNA under NIR laser irradiation (750 nm, 10 min) for four laser on/off cycles.

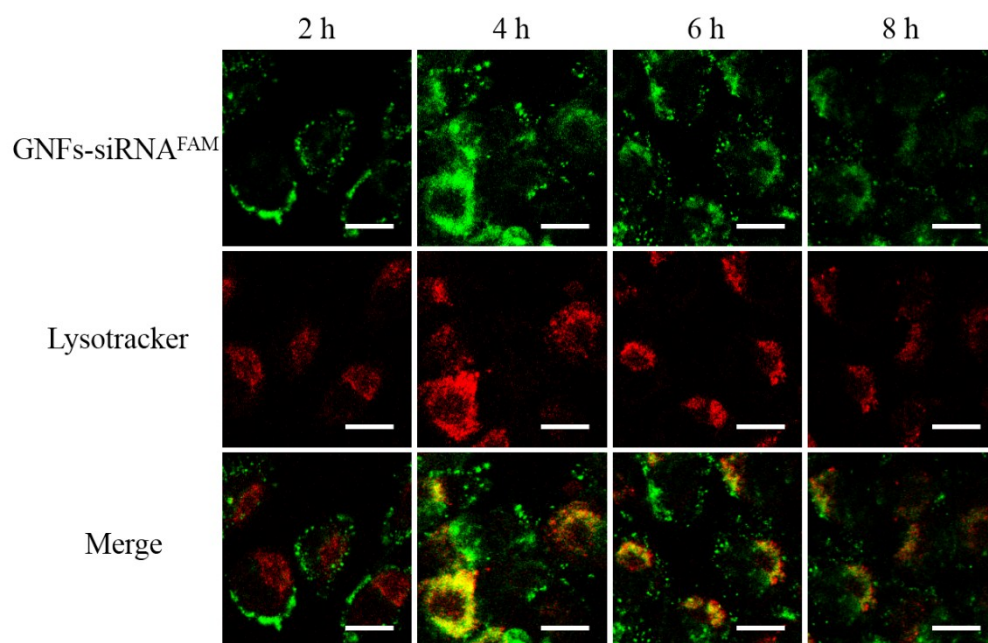

**Fig. S4** Time-dependent confocal microscopy of GNF-siRNA<sup>FAM</sup> successfully escaped from endosomes/ lysosomes. Endo-lysosomes structure was labeled by LysoTracker in red; GNF-siRNA was labeled by FAM in green. Scale bars, 10  $\mu$ m.

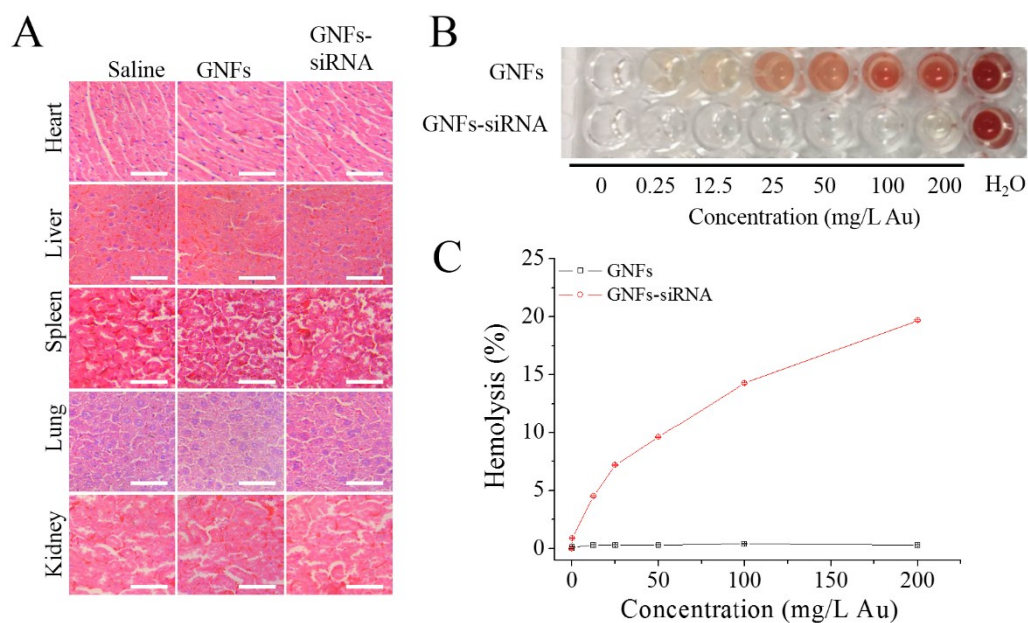

**Fig. S5** (A) H&E images of major organs collected from bearing mice 21 days after intravenous injection of Saline, GNFs, or GNFs-siRNA. Scale bars, 50  $\mu$ m. (B) Digital images showing hemolysis of human red blood cells after incubation with various concentration of GNFs, or GNFs-siRNA for 2 h at 37  $^{\circ}$ C. (C) Corresponding quantitative analysis of hemolysis of human red blood cells.
